# Supplementary material for: A new characterisation of the North Atlantic eddy-driven jet using two-dimensional moment analysis
Source: Copernicus journal article supplement (doi:10.5194/wcd-5-1061-2024), 2024-09-04
Supplement: Supplementary file 1 [file wcd-5-1061-2024-supplement.pdf]

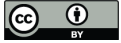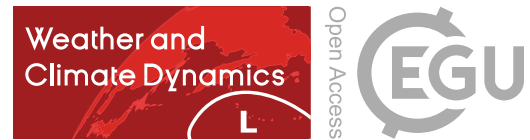

*Supplement of*

## **A new characterisation of the North Atlantic eddy-driven jet using two-dimensional moment analysis**

**Jacob Perez et al.**

*Correspondence to:* Jacob Perez ([scjp@leeds.ac.uk](mailto:scjp@leeds.ac.uk))

The copyright of individual parts of the supplement might differ from the article licence.

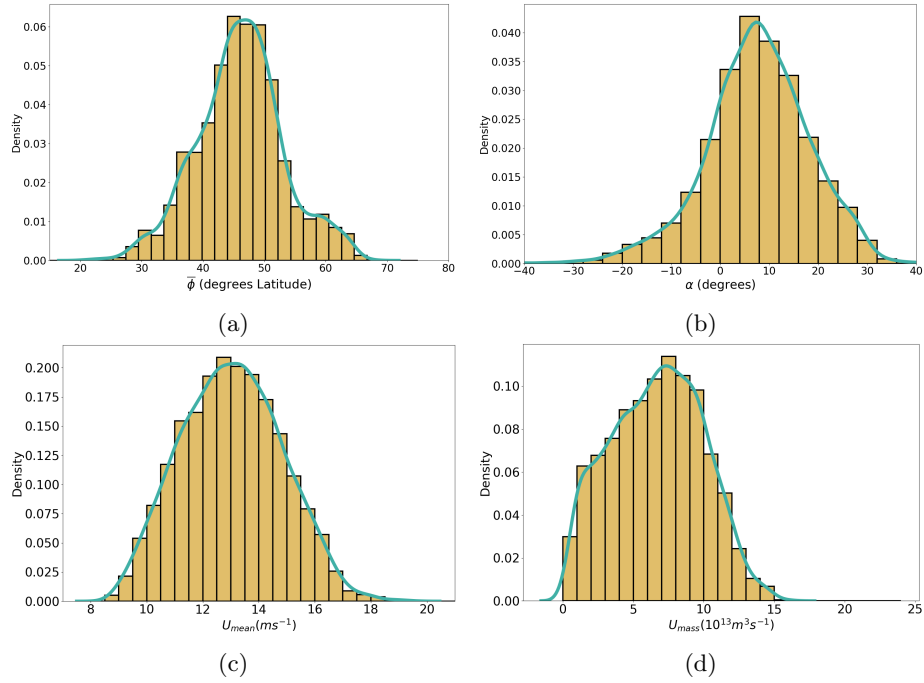

Figure S1: Distributions of (a)  $\bar{\phi}$ , (b)  $\alpha$ , (c)  $U_{\text{mean}}$  and (d)  $U_{\text{mass}}$  which includes values on multiple objects days.

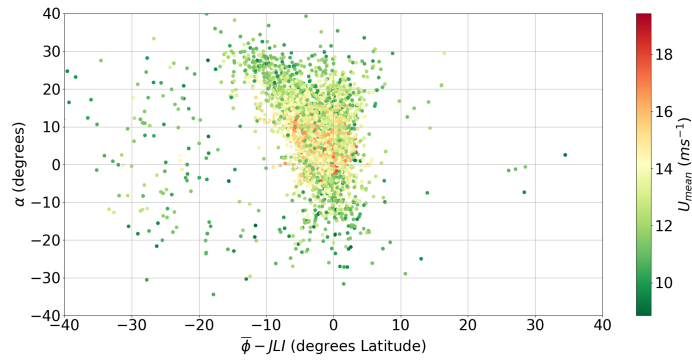

(a)

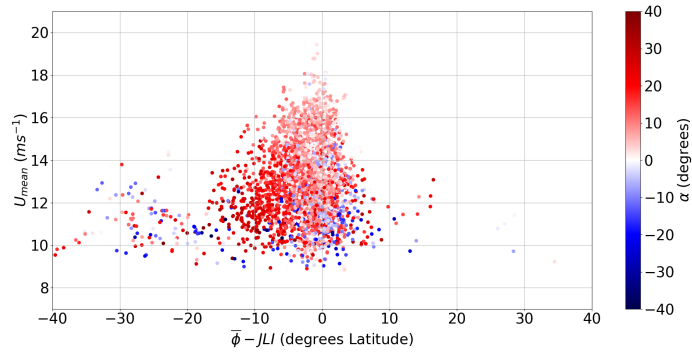

(b)

Figure S2: Scatterplots of daily  $\bar{\phi} - JLI$  plotted against  $\alpha$  and coloured by  $U_{\text{mean}}$  in (a) and vice-versa in (b).
